# Supplementary material for: Increasing identification of foot at risk of complications in patients with diabetes: a quality improvement project in an urban primary health centre in India
Source: PubMed Central journal article supplement (PMC7412605; doi:10.1136/bmjoq-2019-000893), 2020-08-06

### PDSA CYCLES

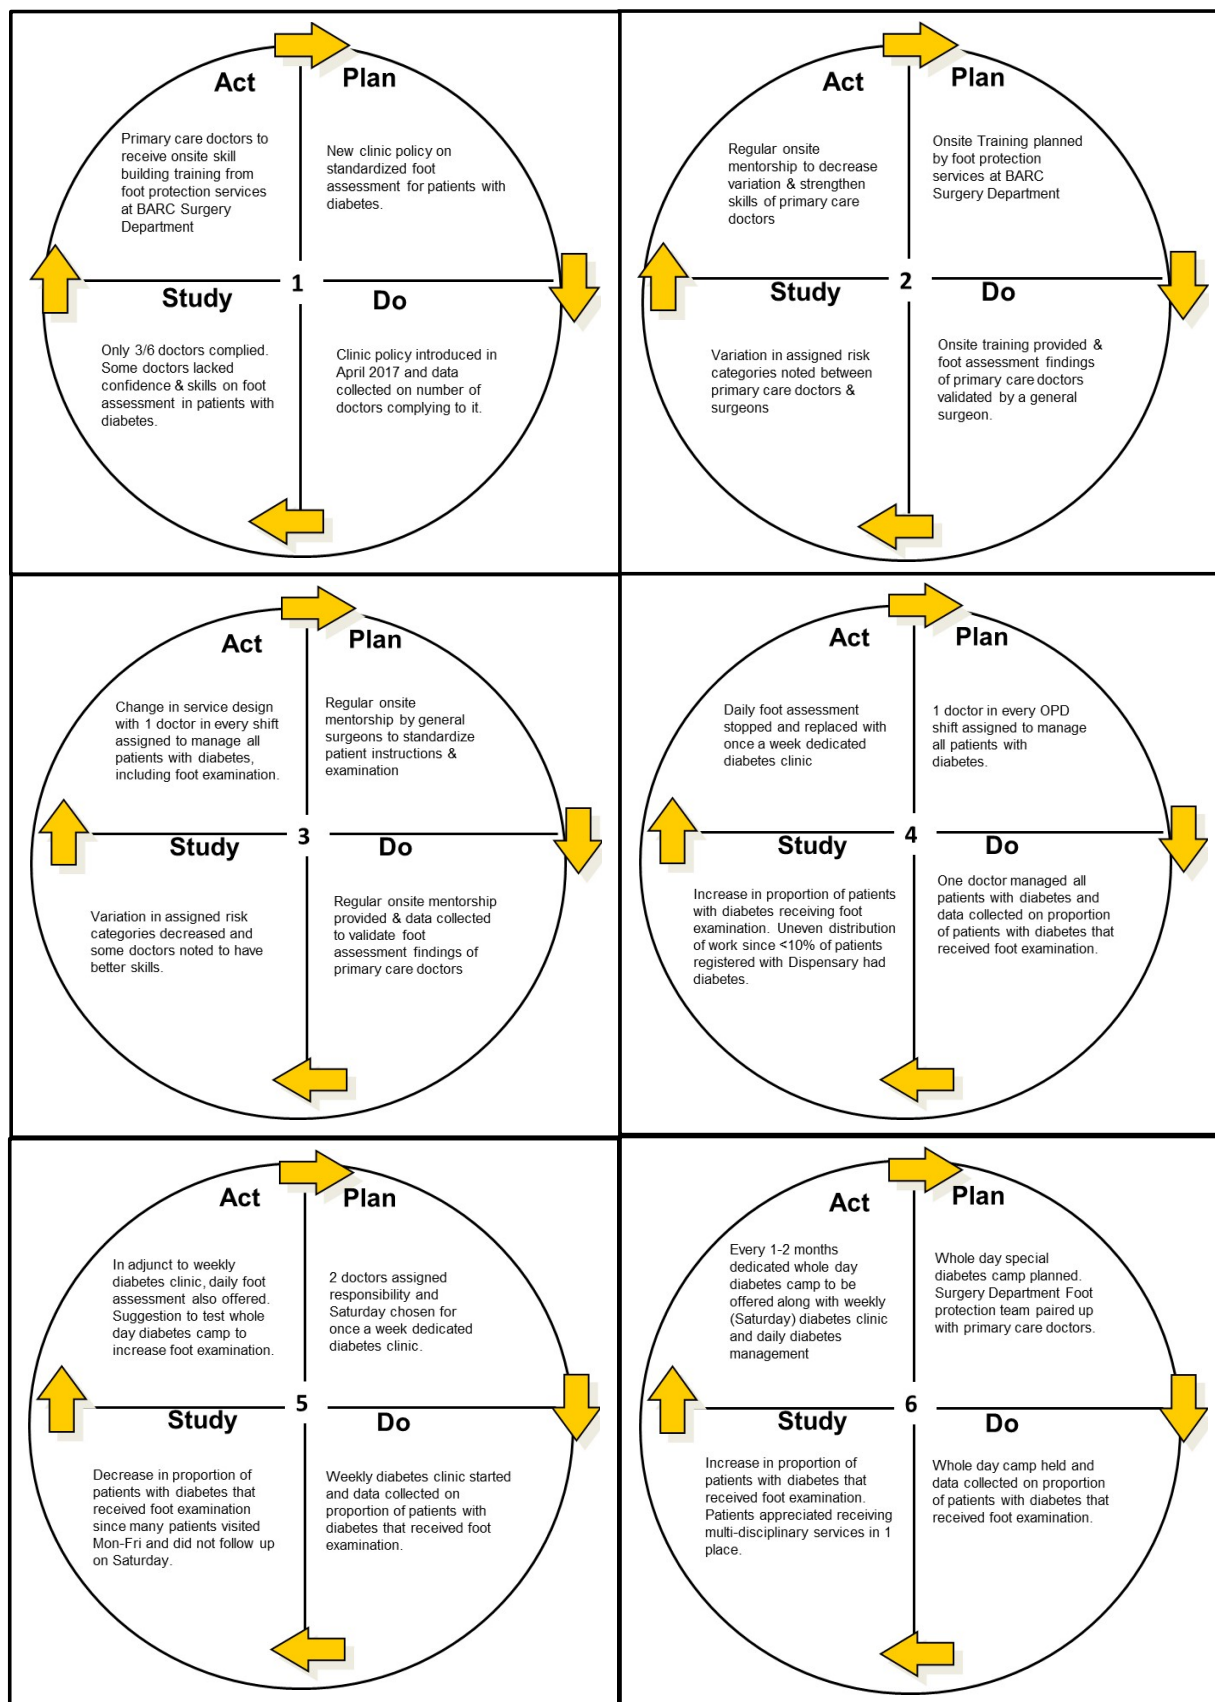

Supplement: bmjoq-2019-000893supp001.pdf [file bmjoq-2019-000893supp001.pdf]
